# Supplementary material for: Tackling chemical etching and its mechanisms of polyphenolic composites in various reactive low temperature plasmas
Source: Royal Society of Chemistry journal article supplement (doi:10.1039/c6ra15923k), 2016-01-01
Supplement: c6ra15923k1.pdf [file c6ra15923k1.pdf]

## Supporting information

In order to confirm the presence of various etch products, mass spectroscopic analysis was carried out. In the case of  $O_2$  plasma, there was no etch products observed at the end of 30<sup>th</sup> second. In the beginning of 3<sup>rd</sup> minute,  $CO$  and  $CO_2$  molecular species were observed at 28 and 44 amu respectively. In the case of  $NH_3$  plasma, peak corresponding to  $HCN$  species were observed, which an indication of  $CN^-$  evolution is. However, this peak was not resolved in the case of  $N_2$  plasma treatment, since the peak could be merged with the peak corresponding to molecular  $N_2$  (28 amu). However in the case of  $H_2$  plasma, only the intensity of  $H_2O$  species showed pronounced increase in the beginning of 3<sup>rd</sup> minute compared to the spectra collected at the end of 30<sup>th</sup> second.

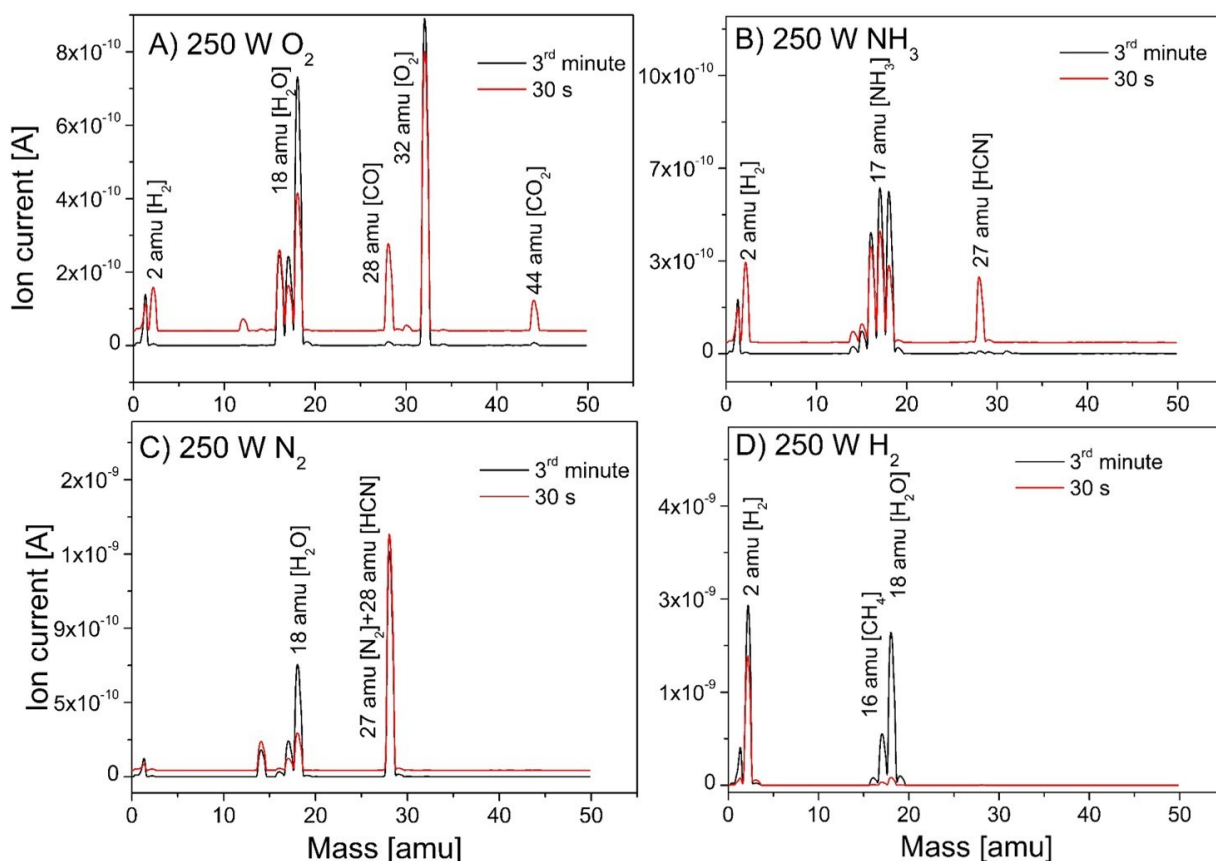

Figure SI 1. Mass spectra collected from different plasma treatments A) 250 W  $O_2$  plasma, B) 250 W  $NH_3$  plasma, C) 250 W  $N_2$  plasma, D) 250 W  $H_2$  plasma.

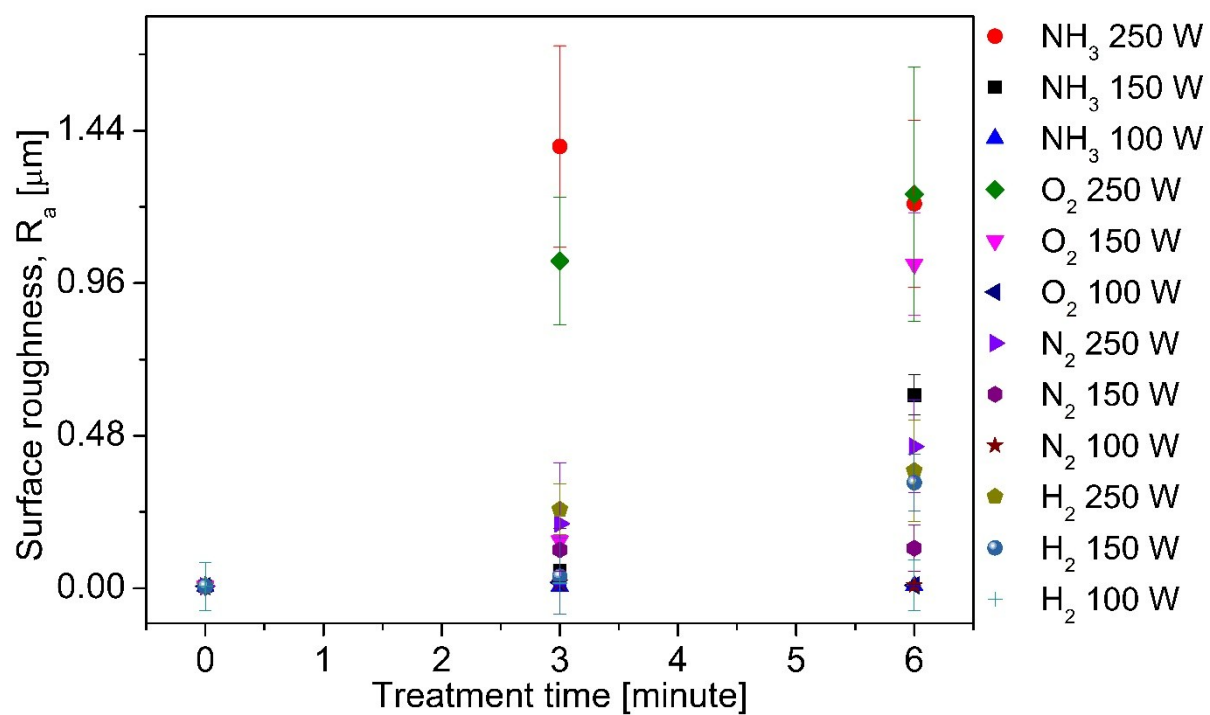

Figure SI 2. The variation of surface roughness as a function of plasma exposure time.
